# Supplementary material for: A series of A- and B-type Anderson compounds with Al, Te and Cr as centers by tuning different ligands: syntheses, electrochemical, photocatalytic and CO2RR properties
Source: Royal Society of Chemistry journal article supplement (doi:10.1039/d1ce00185j), 2021-01-01
Supplement: d1ce00185j1.pdf [file d1ce00185j1.pdf]

Supplementary Material (ESI) for *CrystEngComm*  
This journal is © The Royal Society of Chemistry

## A series of A- and B-type Anderson compounds with Al, Te and Cr as centers by tuning different ligands: syntheses, electrochemical, photocatalytic and CO<sub>2</sub>RR properties

Jun Ying, Baoyue Zhang, Aixiang Tian,\* Xiuli Wang\*

*Department of Chemistry, Bohai University, Jinzhou 121013, P. R. China*

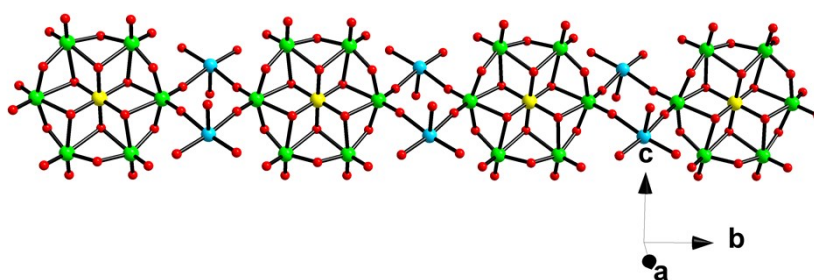

**Fig. S1.** The 1D inorganic chain of **1** with Anderson anions linked by two Zn atoms.

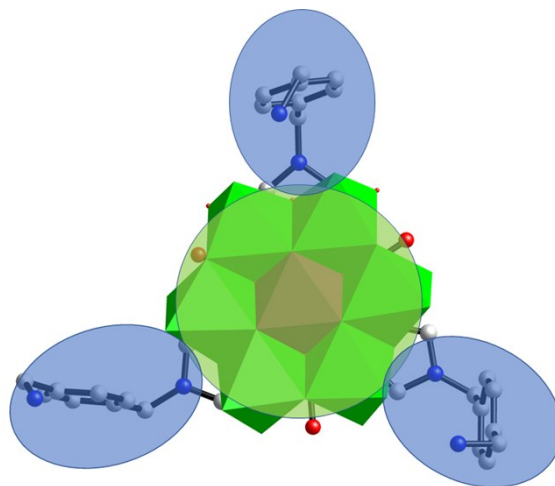

**Fig. S2.** This tri-nuclear [Cu<sup>II</sup><sub>3</sub>(tybm)<sub>3</sub>(H<sub>2</sub>O)<sub>4</sub>]<sup>6+</sup> cluster with three benzylamine groups as petals and the Te1-containing Anderson anion as the centre of the flower.

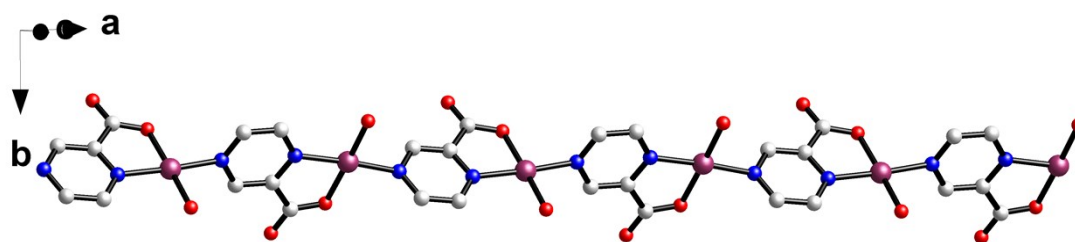

**Fig. S3.** The metal-organic chain  $[\text{Zn}^{\text{II}}(2\text{-pyc})(\text{H}_2\text{O})]_n^{2n+}$  in compound **5**.

## Experimental

### Materials and methods

All reagents and solvents for syntheses were used without further purification from commercial sources. Elemental analyses were performed with a Perkin-Elmer 240C elemental analyzer. The FT-IR spectra were obtained on a Varian FT-IR 640 spectrometer with KBr pellets. The EDS were got by Scanning Electron Microscope S-3000N. We used a Lambda 750 UV/VIS/NIR spectrophotometer to measure UV-Vis absorption spectra. Electrochemical measurements and data collection were completed with a CHI 440 electrochemical workstation. We used a conventional three-electrode system: a saturated calomel electrode (SCE) as reference electrode, a Pt wire as counter electrode and the title compounds modified carbon paste electrodes (CPEs) as the working electrodes.

### X-Ray crystallography

We collected X-ray diffraction analyses data collection for compounds **1–6** on a Bruker SMART APEX II with Mo K $\alpha$  ( $\lambda = 0.71073 \text{ \AA}$ ) by  $\omega$  and  $\theta$  scan mode at 293K. All the structures were solved by direct methods and refined on  $F^2$  by full-matrix least squares using the SHELXL package.<sup>18</sup> Table 1 shows The detailed crystal data and structures refinement for **1–6**. Table S1 exhibits the selected bond lengths and angles. Crystallographic data for these structures **1–6** have been deposited in the Cambridge Crystallographic Data Center with CCDC Numbers of 1985478–1985483 for **1–6**.

## Preparation of compounds 1–6

**Synthesis of**  $\{[\text{Zn}^{\text{II}}_5(\text{trz})_6(\text{H}_2\text{O})_{12}][\text{AlMo}_6(\text{OH})_6\text{O}_{18}]_2\} \cdot (\text{HAlMo}_6(\text{OH})_6\text{O}_{18}) \cdot 23\text{H}_2\text{O}$  **(1).** The reactants  $\text{ZnCl}_2$  (0.068 g, 0.5 mmol) and trz (0.012 g, 0.18 mmol) were dissolved in 30 mL distilled water (solution A). The reactant  $(\text{NH}_4)_3[\text{AlMo}_6\text{H}_6\text{O}_{24}] \cdot 8\text{H}_2\text{O}$  (0.24 g, 0.2 mmol) was dissolved in 30 mL distilled water (solution B). Pour solution B to solution A and mix. The mixture was stirred for 5h and filtered. The pH of filtrate is about 6.5. The filtrate was placed in a 100 mL beaker with plastic wrap. Slow evaporation of the solvent at room temperature produced colourless block crystals of **1** about one week later (40% yield based on Mo). Anal. Calcd for **1**  $\text{C}_{12}\text{H}_{101}\text{Al}_3\text{Mo}_{18}\text{N}_{18}\text{O}_{107}\text{Zn}_5$  (4344.8): C 3.32, H 2.32, N 5.80%. Found: C 3.36, H 2.28, N, 5.85%. IR (KBr,  $\text{cm}^{-1}$ ): 3239(s), 1764(w), 1609(m), 1525(s), 1387(s), 1299(w), 1220(w), 1178(s), 1089(m), 1001(m), 889(s), 822(w), 654(s), 574(w), 440(s).

**Synthesis of**  $\{[\text{Cu}^{\text{II}}_3(\text{tybm})_3(\text{H}_2\text{O})_4][\text{TeMo}_6\text{O}_{24}]\}_2 \cdot (\text{H}_6\text{TeMo}_6\text{O}_{24}) \cdot 16\text{H}_2\text{O}$  **(2).** Mix  $(\text{NH}_4)_6[\text{TeMo}_6\text{O}_{24}] \cdot 7\text{H}_2\text{O}$  (0.2 g, 0.16 mmol),  $\text{CuCl}_2 \cdot 2\text{H}_2\text{O}$  (0.1 g, 0.6 mmol) and tybm (0.02 g, 0.09 mmol) and dissolve in 10 mL distilled water at room temperature. The suspension was stirred for 1h. The pH was adjusted to about 2.4 with  $1.0 \text{ mol} \cdot \text{L}^{-1} \text{HNO}_3$ . The suspension was sealed in a 25 mL Teflon-lined autoclave and kept at  $160^\circ\text{C}$  for 5 days. After cooling to room temperature, blue block crystals of **2** (yield 30% based on Mo). Anal. Calcd for **2**  $\text{C}_{60}\text{H}_{126}\text{Cu}_6\text{Mo}_{18}\text{N}_{24}\text{O}_{96}\text{Te}_3$  (5210.7): C 13.83, H 2.42, N 6.45%. Found: C 13.46, H 2.47, N, 6.52%. IR (KBr,  $\text{cm}^{-1}$ ): 3405(s), 1677(s), 1601(m), 1498(w), 1375(m), 1219(w), 1109(w), 875(s), 686(m), 621(w).

**Synthesis of**  $\{\text{Cu}_2^{\text{I}}(\text{H}_2\text{bdpm})_2[\text{HCr}(\text{OH})_6\text{Mo}_6\text{O}_{18}]\}$  **(3).** Mix  $(\text{NH}_4)_3[\text{CrMo}_6\text{H}_6\text{O}_{24}] \cdot 8\text{H}_2\text{O}$  (0.24 g, 0.2 mmol),  $\text{Cu}(\text{NO}_3)_2 \cdot 3\text{H}_2\text{O}$  (0.12 g, 0.5 mmol),  $\text{H}_2\text{bdpm}$  (0.03 g, 0.18 mmol) and dissolve in 10 mL distilled water at room temperature. The suspension was stirred for 1h. The pH was adjusted to about 2.9 with  $1.0 \text{ mol} \cdot \text{L}^{-1} \text{HCl}$ . The suspension was sealed in a 25 mL Teflon-lined autoclave and kept at  $170^\circ\text{C}$  for 7 days. After cooling to room temperature, blue block crystals

of **3** (yield 30% based on Mo). Anal. Calcd for **3** C<sub>22</sub>H<sub>35</sub>CrCu<sub>2</sub>Mo<sub>6</sub>N<sub>8</sub>O<sub>24</sub> (1550): C 17.05, H 2.26, N 7.23%. Found: C 16.96, H 2.32, N, 7.17%. IR (KBr, cm<sup>-1</sup>): 3268(s), 1627(m), 1542(w), 1450(w), 1370(w), 1316(w), 1278(m), 1137(w), 1048(w), 947(s), 892(s), 796(w), 637(s), 415(s).

**Synthesis of {[Cu<sup>II</sup>(2-pyc)<sub>2</sub>][H<sub>5</sub>Cr(OH)<sub>6</sub>Mo<sub>6</sub>O<sub>18</sub>]}·17H<sub>2</sub>O (**4**).** The reactants Cu(NO<sub>3</sub>)<sub>2</sub>·3H<sub>2</sub>O (0.12 g, 0.5 mmol) and 2-pyc (0.022 g, 0.18 mmol) were dissolved in 30 mL distilled water (solution A). The reactant (NH<sub>4</sub>)<sub>3</sub>[CrMo<sub>6</sub>H<sub>6</sub>O<sub>24</sub>]·8H<sub>2</sub>O (0.24 g, 0.2 mmol) was dissolved in 30 mL distilled water (solution B). Pour solution B to solution A and mix. The mixture was stirred for 5h and filtered. The filtrate was placed in a 100 mL beaker with plastic wrap. Slow evaporation of the solvent at room temperature produced blue block crystals of **4** about two week later (40% yield based on Mo). Anal. Calcd for **4** C<sub>10</sub>H<sub>55</sub>CrCu<sub>2</sub>Mo<sub>6</sub>N<sub>4</sub>O<sub>49</sub> (1770): C 6.79, H 3.11, N 3.17%. Found: C 6.85, H 3.05, N, 3.25%. IR (KBr, cm<sup>-1</sup>): 3255(s), 1696(w), 1626(m), 1538(m), 1446(w), 1362(w), 1308(w), 1228(w), 1128(m), 1048(w), 951(s), 901(s), 792(w), 633(s), 415(s).

**Synthesis of {[Zn<sup>II</sup>(2-pyc)<sub>2</sub>(H<sub>2</sub>O)<sub>2</sub>][HCr(OH)<sub>6</sub>Mo<sub>6</sub>O<sub>18</sub>]}·18H<sub>2</sub>O (**5**).** The synthetic process of **5** is similar to **4**, except the replacement of Cu(NO<sub>3</sub>)<sub>2</sub> by ZnCl<sub>2</sub> (0.068 g, 0.5 mmol). Slow evaporation of the solvent at room temperature produced purple block crystals of **5** about two week later (40% yield based on Mo). Calcd for **5** C<sub>10</sub>H<sub>53</sub>CrMo<sub>6</sub>N<sub>4</sub>O<sub>48</sub>Zn<sub>2</sub> (1756): C 6.84, H 3.02, N 3.19%. Found: C 6.77, H 3.09, N, 3.13%. IR (KBr, cm<sup>-1</sup>): 3490(w), 3192(s), 1759(w), 1626(w), 1533(m), 1387(s), 1303(w), 1220(w), 1174(w), 1094(m), 1044(w), 1006(m), 947(s), 892(s), 822(w), 654(s), 574(w), 415(s).

**Synthesis of {[Co<sup>II</sup>(2-pyc)(H<sub>2</sub>O)<sub>2</sub>]<sub>2</sub>[HCr(OH)<sub>6</sub>Mo<sub>6</sub>O<sub>18</sub>]}·15H<sub>2</sub>O (**6**).** The synthetic process of **6** is similar to **4**, except the replacement of Cu(NO<sub>3</sub>)<sub>2</sub> by Co(NO<sub>3</sub>)<sub>2</sub> (0.08 g, 0.4 mmol). Slow evaporation of the solvent at room temperature produced purple block crystals of **6** about one month later (40% yield based on Mo). Calcd for **6** C<sub>10</sub>H<sub>45</sub>CrCo<sub>2</sub>Mo<sub>6</sub>N<sub>4</sub>O<sub>47</sub> (1719): C 6.99, H 2.62, N 3.26%. Found: C 6.91, H 2.69, N, 3.21%. IR (KBr, cm<sup>-1</sup>): 3360(s), 1685(s), 1602(w), 1423(s), 1287(w),

1217(m), 1175(w), 921(s), 893(s), 791(w), 694(s), 602(w), 503(w), 455(s).

**Preparation of 3–CPE.** Compound **3** modified CPE (**3–CPE**) was made as follows: the graphite powder and **3** were mixed at a ratio of 10: 1, which was grounded in an agate mortar with a pestle to form a uniform mixture. 0.1 mL of Nujol was added with stirring. The homogenized mixture was packed into a glass tube with a 1.5 mm inner diameter. The tube surface was wiped with weighing paper. Electrical contact was established with a copper rod through the back of the electrode.

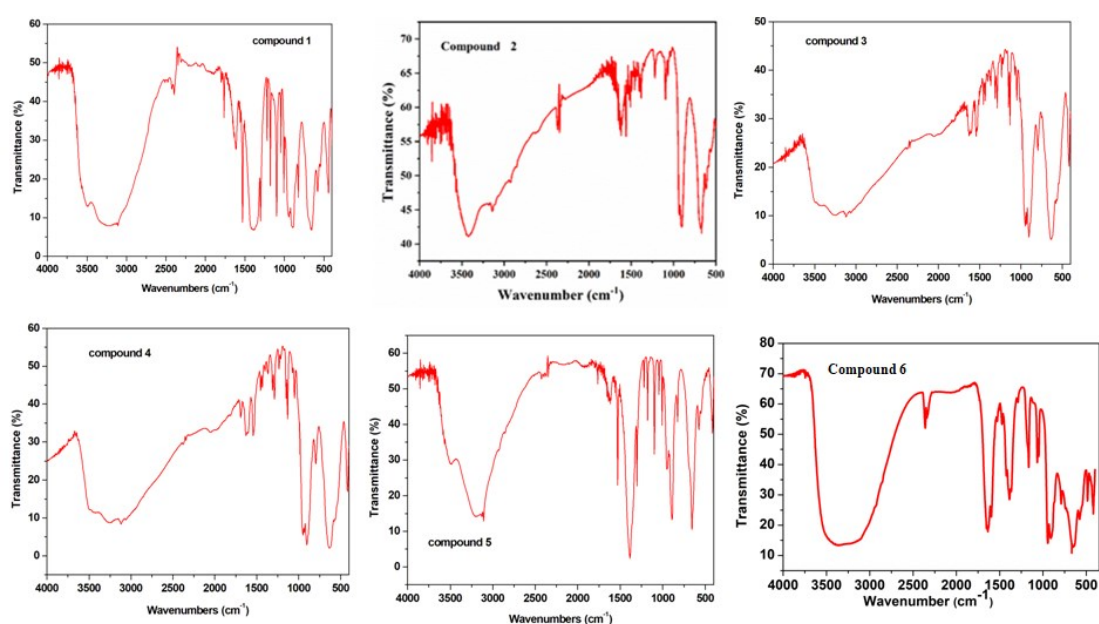

**Fig. S4.** The IR spectra of compounds **1–6**.

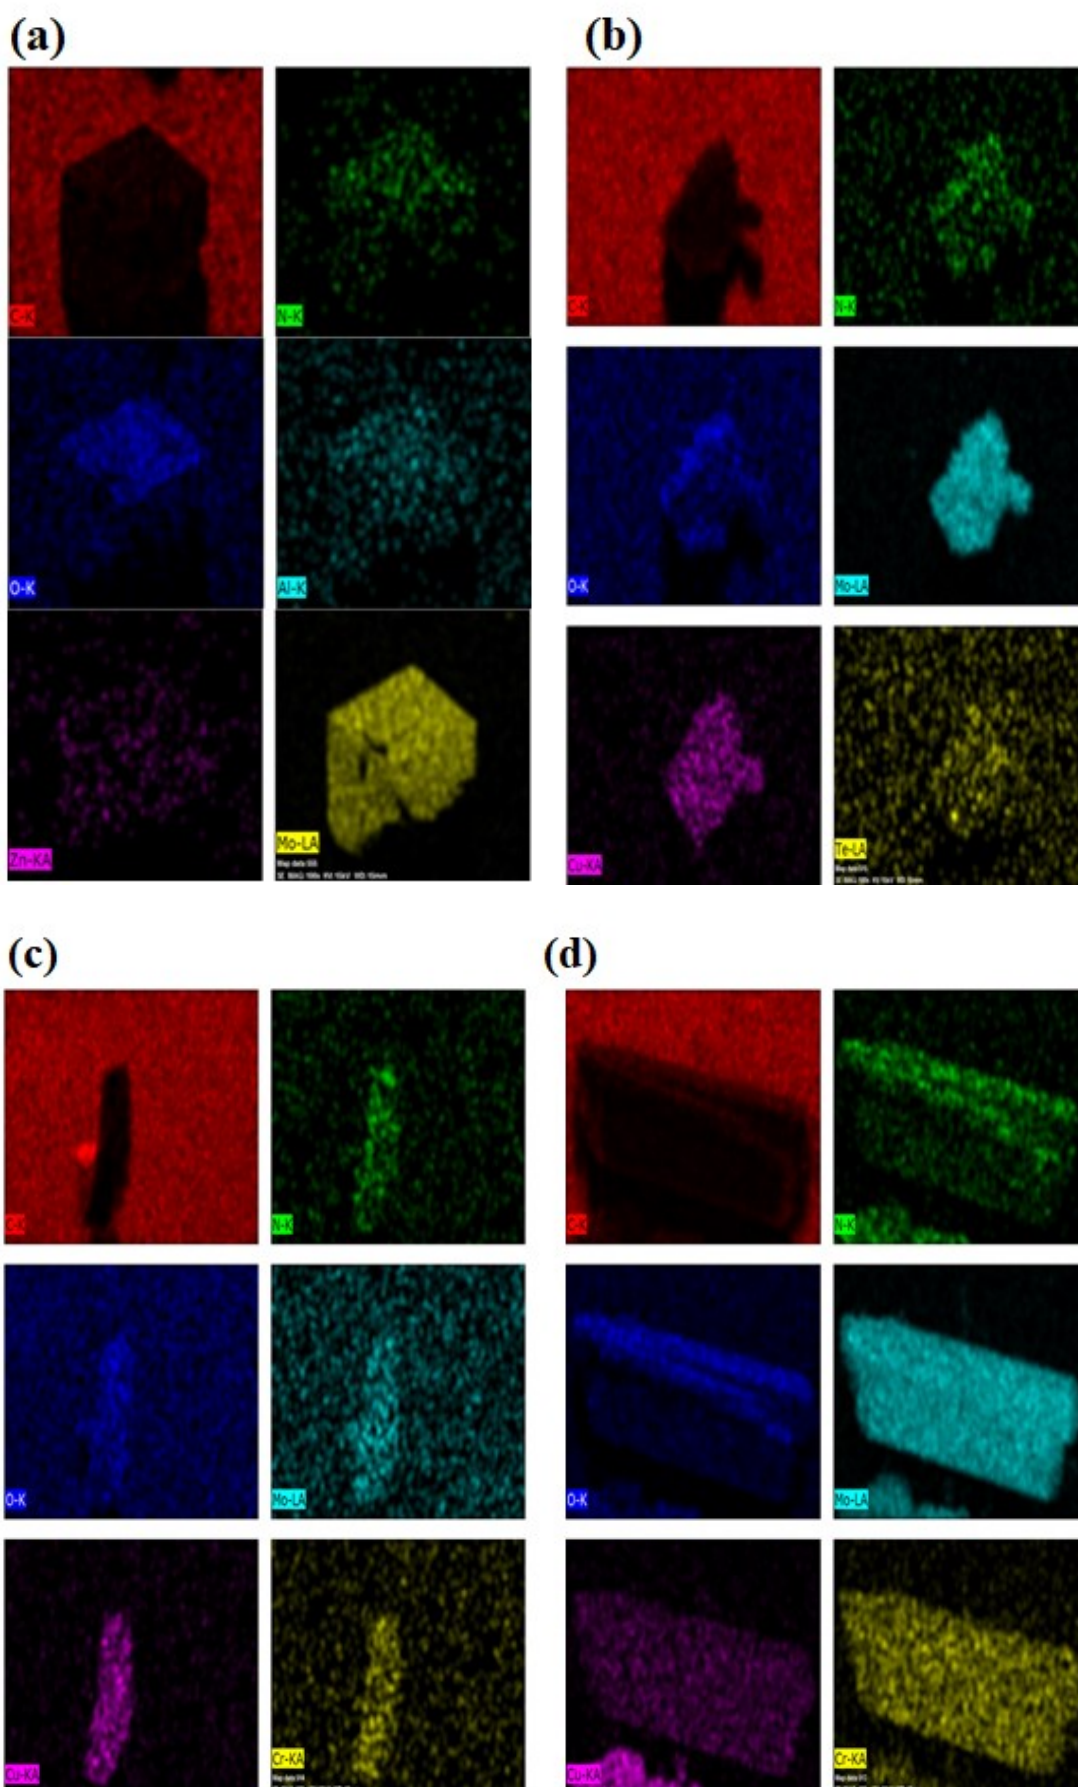



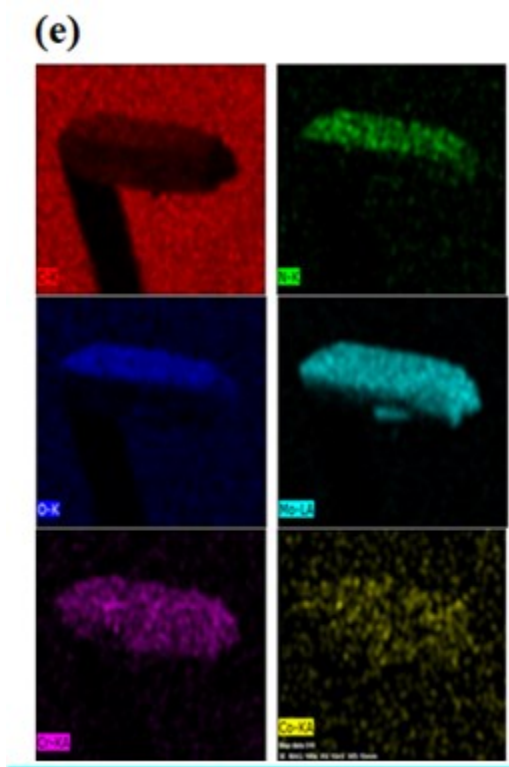

**Fig. S5.** The elemental mapping images of compounds 1(a), 2(b), 3(c), 4(d) and 5(e).

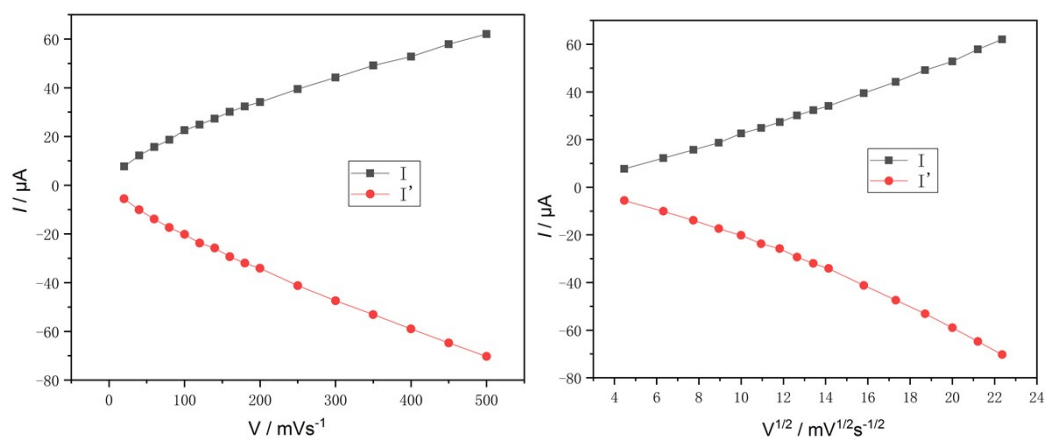

**Fig. S6.** Plots of the anodic and the cathodic peak II–II' current against  $v$  and  $v^{1/2}$ .

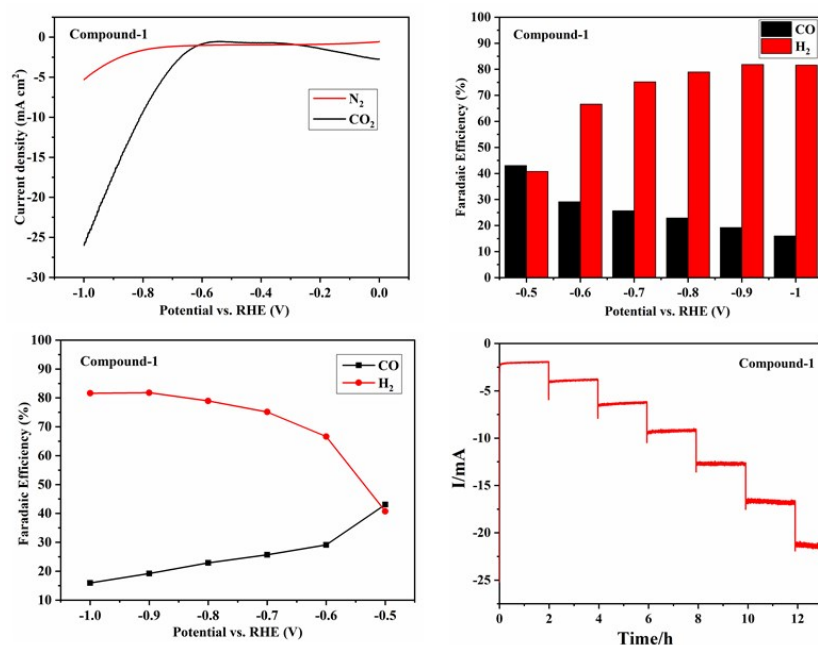

**Fig. S7.** (a) LSV curves of compound **1** in CO<sub>2</sub>-saturated and N<sub>2</sub>-saturated 0.5 M KHCO<sub>3</sub> electrolyte on carbon paper at a scan rate of 5 mV s<sup>-1</sup>. (b) The Faradaic efficiency of compound **1** for CO (red bars) and H<sub>2</sub> (black bars). (c) The FE of CO and H<sub>2</sub> products on compound **1** at selected potentials. (d) The i-t curve of compound **1** during the electrolysis.

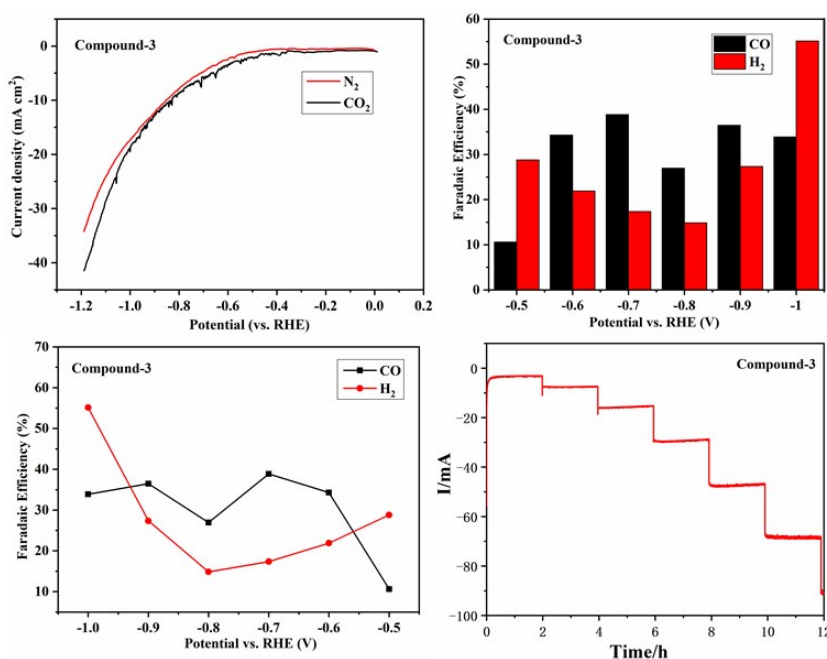

**Fig. S8.** (a) LSV curves of compound **3** in CO<sub>2</sub>-saturated and N<sub>2</sub>-saturated 0.5 M KHCO<sub>3</sub> electrolyte on carbon paper at a scan rate of 5 mV s<sup>-1</sup>. (b) The Faradaic efficiency of compound **3** for CO (red bars) and H<sub>2</sub> (black bars). (c) The FE of CO



and H<sub>2</sub> products on compound **3** at selected potentials. (d) The i-t curve of compound **3** during the electrolysis.

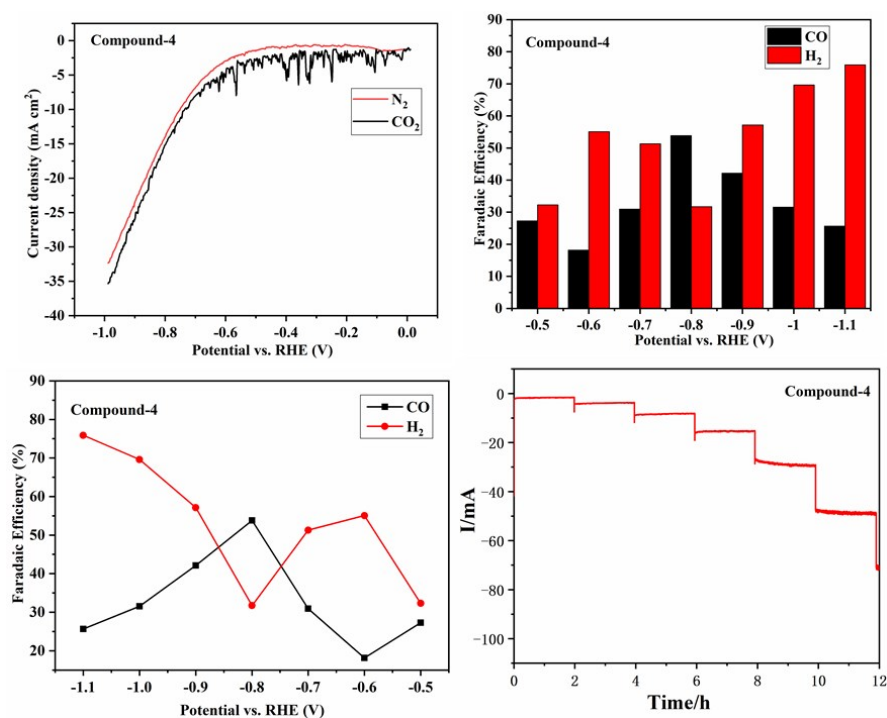

**Fig. S9.** (a) LSV curves of compound **4** in CO<sub>2</sub>-saturated and N<sub>2</sub>-saturated 0.5 M KHCO<sub>3</sub> electrolyte on carbon paper at a scan rate of 5 mV s<sup>-1</sup>. (b) The Faradaic efficiency of compound **4** for CO (red bars) and H<sub>2</sub> (black bars). (c) The FE of CO and H<sub>2</sub> products on compound **4** at selected potentials. (d) The i-t curve of compound **4** during the electrolysis.

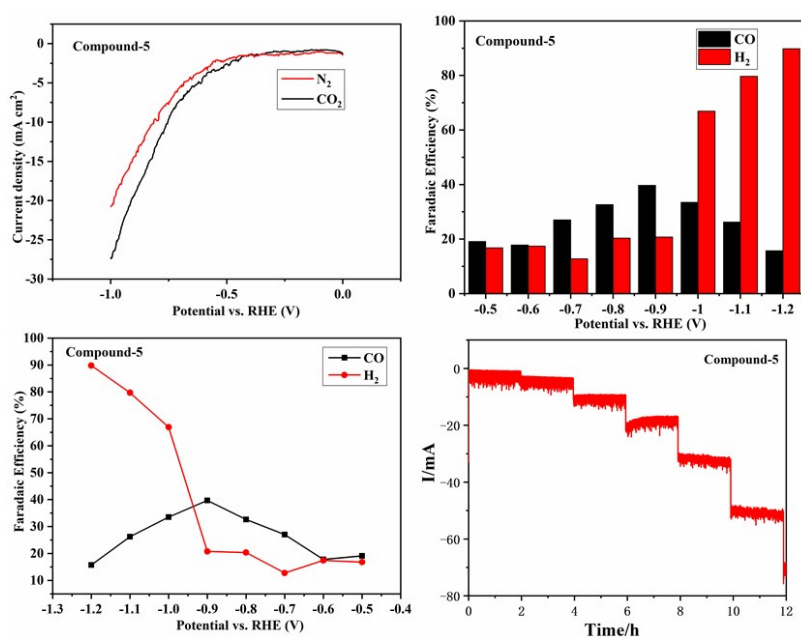

**Fig. S10.** (a) LSV curves of compound **5** in CO<sub>2</sub>-saturated and N<sub>2</sub>-saturated 0.5 M KHCO<sub>3</sub> electrolyte on carbon paper at a scan rate of 5 mV s<sup>-1</sup>. (b) The Faradaic efficiency of compound **5** for CO (red bars) and H<sub>2</sub> (black bars). (c) The FE of CO and H<sub>2</sub> products on compound **5** at selected potentials. (d) The i-t curve of compound **5** during the electrolysis.

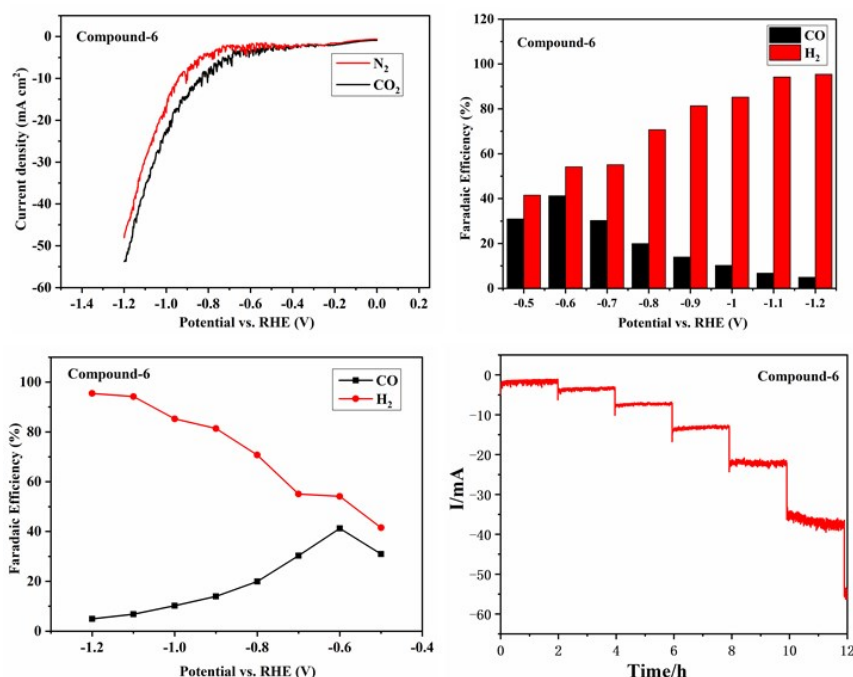

**Fig. S11.** (a) LSV curves of compound **6** in CO<sub>2</sub>-saturated and N<sub>2</sub>-saturated 0.5 M KHCO<sub>3</sub> electrolyte on carbon paper at a scan rate of 5 mV s<sup>-1</sup>. (b) The Faradaic efficiency of compound **6** for CO (red bars) and H<sub>2</sub> (black bars). (c) The FE of CO and H<sub>2</sub> products on compound **6** at selected potentials. (d) The i-t curve of compound **6** during the electrolysis.

**Table S1.** Selected bond distances (Å) and angles (°) for compounds **1–6**.

| Compound <b>1</b> |           |              |           |
|-------------------|-----------|--------------|-----------|
| Zn(1)-N(2)        | 2.046(9)  | Zn(3)-N(8)#3 | 2.189(13) |
| O(8W)-Zn(1)       | 2.02(2)   | O(5W)-Zn(2)  | 2.234(15) |
| O(7W)-Zn(1)       | 2.079(15) | O(3W)-Zn(2)  | 2.123(12) |
| O(6W)-Zn(1)       | 2.15(2)   | O(4W)-Zn(2)  | 2.224(15) |
| Zn(2)-N(6)#3      | 2.141(13) | Zn(3)-N(8)   | 2.189(13) |
| Zn(2)-N(7)        | 2.116(12) | Zn(3)-N(4)   | 2.212(13) |

|                                                                               |            |                   |            |
|-------------------------------------------------------------------------------|------------|-------------------|------------|
| Zn(2)-N(3)                                                                    | 2.062(10)  | Zn(3)-N(1)        | 2.122(9)   |
| O(27)-Zn(1)                                                                   | 2.227(10)  | O(25)-Zn(1)#2     | 2.231(10)  |
| O(27)-Zn(1)-O25#4                                                             | 81.5(3)    | N(3)-Zn(2)-N(6)#3 | 95.1(4)    |
| N(8)-Zn(3)-N(4)#3                                                             | 90.3(4)    | N(3)-Zn(2)-N(7)   | 91.0(4)    |
| N(2)-Zn(1)-O(27)                                                              | 85.9(4)    | N(8)-Zn(3)-N(8)#3 | 90.7(7)    |
| N(8)-Zn(3)-N(4)                                                               | 176.1(5)   | N(4)#3-Zn(3)-N(4) | 88.9(7)    |
| N(8)#3-Zn(3)-N(4)                                                             | 90.3(4)    | N(1)-Zn(3)-N(8)   | 89.0(4)    |
| N(1)-Zn(3)-N(8)#3                                                             | 92.0(4)    | N(1)#3-Zn(3)-N(4) | 91.7(4)    |
| N(1)#3-Zn(3)-N8#3                                                             | 89.0(4)    | N(1)#3-Zn(3)-N4#3 | 87.2(5)    |
| N(1)#3-Zn(3)-N(8)                                                             | 92.0(4)    | N(1)-Zn(3)-N(4)#3 | 91.7(4)    |
| N(1)-Zn(3)-N(4)                                                               | 87.2(5)    | N(1)-Zn(3)-N(1)#3 | 178.5(8)   |
| Symmetry codes for <b>1</b> : #1 -x,y,-z+2 #2 x,y-1,z #3 -x,y,-z+1 #4 x,y+1,z |            |                   |            |
| <b>Compound 2</b>                                                             |            |                   |            |
| Cu(1)-O(4)                                                                    | 2.324(4)   | Cu(2)-O(4W)       | 1.987(4)   |
| Cu(1)-O(4W)                                                                   | 1.968(4)   | Cu(2)-O(2W)       | 1.996(5)   |
| Cu(1)-N(7)                                                                    | 1.979(6)   | Cu(2)-N(8)        | 1.946(6)   |
| Cu(1)-O(1W)                                                                   | 1.986(5)   | Cu(2)-N(3)        | 1.935(6)   |
| Cu(1)-N(5)                                                                    | 1.964(6)   | Cu(3)-O(4W)       | 1.987(5)   |
| Cu(3)-N(2)                                                                    | 1.957(6)   | Cu(3)-O(24)       | 2.366(4)   |
| Cu(3)-N(4)                                                                    | 1.955(5)   | Cu(3)-O(3W)       | 1.985(5)   |
| O4W-Cu(1)-O1W                                                                 | 164.96(19) | N(7)-Cu(1)-O(4)   | 97.97(19)  |
| O(1W)-Cu(1)-O(4)                                                              | 94.93(18)  | N(5)-Cu(1)-O(4W)  | 88.1(2)    |
| N(5)-Cu(1)-N(7)                                                               | 170.8(2)   | O4W-Cu(2)-O2W     | 163.8(2)   |
| N(8)-Cu(2)-O(4W)                                                              | 89.1(2)    | N(3)-Cu(2)-O(2W)  | 91.5(2)    |
| N(3)-Cu(2)-N(8)                                                               | 179.1(2)   | O(4W)-Cu(3)-O(24) | 97.05(16)  |
| N(2)-Cu(3)-O(4W)                                                              | 88.1(2)    | O3W-Cu(3)-O4W     | 159.8(2)   |
| N(2)-Cu(3)-O(24)                                                              | 93.67(18)  | N(4)-Cu(3)-N(2)   | 172.4(2)   |
| <b>Compound 3</b>                                                             |            |                   |            |
| Cu(1)-N(1)                                                                    | 1.873(5)   | Cu(1)-N(3)#2      | 1.886(5)   |
| Cu(1)-O(1)                                                                    | 2.367(4)   | N(1)-Cu(1)-O(1)   | 98.0(2)    |
| N(1)-Cu(1)-N(3)#2                                                             | 168.4(2)   | N(3)#2-Cu(1)-O(1) | 93.4(2)    |
| Symmetry codes for <b>3</b> : #2 -x+2, y+1/2, -z+1/2                          |            |                   |            |
| <b>Compound 4</b>                                                             |            |                   |            |
| Cr(1)-O(5)#1                                                                  | 1.9834(16) | Mo(3)-O(9)#1      | 1.9572(18) |
| Cr(1)-O(5)                                                                    | 1.9834(16) | Mo(3)-O(11)       | 1.9261(19) |
| Cr(1)-O(8)#1                                                                  | 1.9713(16) | Mo(3)-O(12)       | 2.2966(17) |
| Cr(1)-O(8)                                                                    | 1.9713(16) | O1W-Cu(1)         | 2.279(2)   |
| Cr(1)-O(12)                                                                   | 1.9703(17) | O2W-Cu1           | 1.9744(18) |
| Cr(1)-O(12)#1                                                                 | 1.9703(17) | O(8)-Mo(3)#1      | 2.2956(17) |

|                                                                                                                     |            |                        |            |
|---------------------------------------------------------------------------------------------------------------------|------------|------------------------|------------|
| Mo(1)-O(1)                                                                                                          | 1.696(2)   | O(9)-Mo(3)#1           | 1.9572(18) |
| Mo(1)-O(4)                                                                                                          | 1.714(2)   | O(13)-C(5)             | 1.222(3)   |
| Mo(1)-O(5)                                                                                                          | 2.3123(18) | O(14)-Cu(1)            | 1.9535(19) |
| Mo(1)-O(10)                                                                                                         | 1.9477(17) | O(14)-C(5)             | 1.278(3)   |
| Mo(1)-O(11)                                                                                                         | 1.9301(18) | Cu(1)-N(1)#2           | 2.017(2)   |
| Mo(1)-O(12)                                                                                                         | 2.2842(17) | Cu(1)-N(2)             | 2.020(2)   |
| Cr(1)-O(5)#1                                                                                                        | 1.9834(16) | Mo(3)-O(9)#1           | 1.9572(18) |
| Symmetry codes for <b>4</b> : #1 -x+1,-y-2,-z #2 x-1,y,z #3 x+1,y,z                                                 |            |                        |            |
| <b>Compound 5</b>                                                                                                   |            |                        |            |
| Zn(1)-N(2)                                                                                                          | 2.001(3)   | Zn(1)-O(14)            | 1.952(3)   |
| Zn(1)-O(7)                                                                                                          | 2.382(3)   | Zn(1)-O1W              | 1.968(3)   |
| Zn(1)-N(1)#3                                                                                                        | 2.091(4)   | Zn(1)-O(4)#2           | 2.404(3)   |
| O(7)-Zn(1)-Mo(1)                                                                                                    | 140.93(18) | O(4)-Zn(1)-<br>Mo(2)#2 | 137.53(18) |
| O1W-Zn(1)-O(4)#3                                                                                                    | 85.87(14)  | O1W-Zn(1)-O7           | 90.86(14)  |
| O(7)-Zn(1)-O(4)#3                                                                                                   | 171.74(11) | O(14)-Zn(1)-O1W        | 175.26(14) |
| O(14)-Zn(1)-O(4)#3                                                                                                  | 91.18(13)  | O(14)-Zn(1)-O(7)       | 91.57(13)  |
| O(14)-Zn(1)-N(1)                                                                                                    | 92.33(14)  | O(14)-Zn(1)-N(2)       | 82.73(13)  |
| N(1)#4-Zn(1)-O4#3                                                                                                   | 92.92(13)  | N(1)#4-Zn(1)-O(7)      | 94.75(13)  |
| N(2)-Zn(1)-O4#3                                                                                                     | 88.27(12)  | N(2)-Zn(1)-O7          | 84.35(13)  |
| Symmetry codes for <b>5</b> : #11-x,-y,2-z #2 1/2+x,-1/2-y,-1/2+z #3-1/2+x,-1/2-y,1/2+z #4 -<br>1/2+x,-1/2-y,-1/2+z |            |                        |            |
| <b>Compound 6</b>                                                                                                   |            |                        |            |
| Co(1)-O(12)                                                                                                         | 2.109(4)   | Co(1)-O(13)            | 2.051(4)   |
| Co(1)-O(5W)                                                                                                         | 2.070(4)   | Co(1)-O(4W)            | 2.102(4)   |
| Co(1)-N(1)                                                                                                          | 2.130(4)   | Co(1)-N(2)#2           | 2.143(4)   |
| O(13)-Co(1)-O(5W)                                                                                                   | 171.26(15) | O(13)-Co(1)-O(4W)      | 91.65(16)  |
| O(13)-Co(1)-O(12)                                                                                                   | 90.73(15)  | O(13)-Co(1)-N(1)       | 79.07(16)  |
| O(13)-Co(1)-N(2)#2                                                                                                  | 98.59(16)  | O(5W)-Co(1)-O(12)      | 86.22(15)  |
| O5W-Co(1)-O4W                                                                                                       | 91.39(17)  | O(5W)-Co(1)-N(1)       | 92.60(16)  |
| O5W-Co(1)-N(2)#2                                                                                                    | 89.70(16)  | O(12)-Co(1)-N(1)       | 87.62(15)  |
| O(12)-Co(1)-N(2)#2                                                                                                  | 91.83(16)  | O(4W)-Co(1)-O(12)      | 177.61(16) |
| O(4W)-Co(1)-N(1)                                                                                                    | 92.63(16)  | O4W-Co(1)-N(2)#2       | 88.02(16)  |
| N(1)-Co(1)-N(2)#2                                                                                                   | 177.59(18) |                        |            |
| Symmetry codes for <b>6</b> : #2 x, -y+1/2, z+1/2                                                                   |            |                        |            |

Table S2. Comparison of the catalytic performance with other electrodes for MB.

| Catalyst(mg)     | time    | conversion | Ref.      |
|------------------|---------|------------|-----------|
| <b>1 (100mg)</b> | 120 min | 55.9%      | This work |
| <b>2 (100mg)</b> | 120 min | 54.1%      | This work |
| <b>3 (100mg)</b> | 120 min | 60.0%      | This work |
| <b>4 (100mg)</b> | 120 min | 54.5%      | This work |

|                  |         |       |           |
|------------------|---------|-------|-----------|
| <b>5 (100mg)</b> | 120 min | 48.6% | This work |
| <b>6 (100mg)</b> | 120 min | 59.6% | This work |
| <b>1</b>         | 120 min | 57.3% | <b>S1</b> |
| <b>2</b>         | 120 min | 58%   | <b>S1</b> |
| <b>6 (150mg)</b> | 150 min | 58.6% | <b>S2</b> |
| <b>7 (150mg)</b> | 150 min | 74.5% | <b>S2</b> |

Table S3. Comparison of the catalytic performance with other electrodes for RhB.

| Catalyst(mg)     | time    | conversion | Ref.      |
|------------------|---------|------------|-----------|
| <b>1 (100mg)</b> | 120 min | 62.2%      | This work |
| <b>2 (100mg)</b> | 120 min | 54.3%      | This work |
| <b>3 (100mg)</b> | 120 min | 53.2%      | This work |
| <b>4 (100mg)</b> | 120 min | 50.0%      | This work |
| <b>5 (100mg)</b> | 120 min | 45.9%      | This work |
| <b>6 (100mg)</b> | 120 min | 34.1%      | This work |
| <b>4</b>         | 120 min | 42.4%      | <b>S1</b> |
| <b>5</b>         | 120 min | 50.8%      | <b>S1</b> |
| <b>1</b>         | 180 min | 14.3%      | <b>S3</b> |
| <b>2</b>         | 180 min | 15.7%      | <b>S3</b> |

Table S4. Comparison of the catalytic performance with other electrodes for GV.

| Catalyst(mg)     | time    | conversion | Ref.      |
|------------------|---------|------------|-----------|
| <b>1 (100mg)</b> | 120 min | 60.8%      | This work |
| <b>2 (100mg)</b> | 120 min | 72.9%      | This work |
| <b>3 (100mg)</b> | 120 min | 76.8%      | This work |
| <b>4 (100mg)</b> | 120 min | 54.9%      | This work |
| <b>5 (100mg)</b> | 120 min | 58.6%      | This work |
| <b>6 (100mg)</b> | 120 min | 44.7%      | This work |
| <b>1</b>         | 180 min | 94.3%      | <b>S3</b> |
| <b>3</b>         | 180 min | 31.1%      | <b>S3</b> |
| <b>1 (50mg)</b>  | 2 min   | 99.05%     | <b>S4</b> |
| <b>2 (50mg)</b>  | 40 min  | 71.43%     | <b>S4</b> |

Table S5. Comparison of the CO<sub>2</sub>RR catalytic performance with other electrodes for CO production.

| Catalyst | Potential<br>(V vs. RHE) | Electrolyte             | Products | FE<br>(%) | Ref.      |
|----------|--------------------------|-------------------------|----------|-----------|-----------|
| <b>1</b> | -0.2                     | 0.5 M KHCO <sub>3</sub> | CO       | 43.2      | This work |
| <b>2</b> | -0.8                     | 0.5 M KHCO <sub>3</sub> | CO       | 93.4      | This work |

|            |       |                         |    |       |           |
|------------|-------|-------------------------|----|-------|-----------|
| 3          | -0.7  | 0.5 M KHCO <sub>3</sub> | CO | 39.0  | This work |
| 4          | -0.8  | 0.5 M KHCO <sub>3</sub> | CO | 53.8  | This work |
| 5          | -0.9  | 0.5 M KHCO <sub>3</sub> | CO | 39.6  | This work |
| 6          | -0.6  | 0.5 M KHCO <sub>3</sub> | CO | 41.2  | This work |
| Cu-ACs/NPC | -0.5  | 0.5 M KHCO <sub>3</sub> | CO | 93.21 | S5        |
| Cu-N4/GN   | -0.5  | 0.1 M KHCO <sub>3</sub> | CO | 62    | S6        |
| Cu-N-C     | -0.66 | 0.5 M KHCO <sub>3</sub> | CO | 21    | S7        |

- S1. Wang, C.; Ying, J.; Mou, H. -C.; Tian, A. -X.; Wang, X. -L.; *Inorg. Chem. Front.*, 2020, **7**, 3882.
- S2. Tian, A. -X.; Yang, M. -L.; Fu, Y. -B.; Ying, J.; Wang, X. -L.; *Inorg. Chem.*, 2019, **58**, 4190.
- S3. Li, L.; Wang, X.; Xu, N.; Chang, Z. -H.; Liu, G. -C.; Lin, H. -Y.; Wang, X. -L.; *CrystEngComm.*, 2020, **22**, 8322.
- S4. Cui, Z. -W.; Wang, X. -L.; Lin, H. -Y.; Xu, N.; Wang, X.; Liu, G. -C.; Chang, Z. -H.; *Inorg. Chim. Acta.*, 2020, **513**, 119937.
- S5. Gao, J.; Wang, H.; Feng, K.; Xiang, C. -S.; Wang, H. -B.; Qi, H. -H.; Liu, Y.; Tian, H.; Zhong, J.; Kang, Z. -H.; *Mater. Adv.*, 2020, **1**, 2286.
- S6. Zheng, W.; Yang, J.; Chen, H.; Hou, Y.; Wang, Q.; Gu, M.; He, F.; Xia, Y.; Xia, Z.; Li, Z.; Yang, B.; Lei, L.; Yuan, C.; He, Q.; Qiu, M.; Feng, X.; *Adv. Funct. Mater.*, 2020, **30**, 1907658.
- S7. Roy, A.; Hursan, D.; Artyushkova, K.; Atanassov, P.; Janaky, C.; Serov, A.; *Appl. Catal. B. Environ.*, 2018, **232**, 512.
